# Supplementary material for: The cAMP-PKA pathway-mediated fat mobilization is required for cold tolerance in C. elegans
Source: PubMed Central journal article supplement (PMC5428847; doi:10.1038/s41598-017-00630-w), 2017-04-04
Supplement: 41598_2017_630_MOESM1_ESM.pdf [file 41598_2017_630_MOESM1_ESM.pdf]

**The cAMP-PKA pathway-mediated fat mobilization is required for cold tolerance in *C. elegans***

**Fang Liu, Yi Xiao, Xing-Lai Ji, Ke-Qin Zhang, Cheng-Gang Zou**

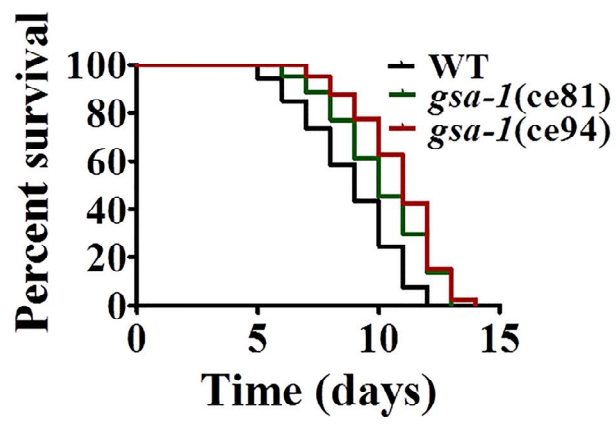

**Supplementary Figure 1. Mutations in *gsa-1(ce94)* and *gsa-1(ce81)* promote survival of worms under cold conditions.  $P < 0.01$  relative to wild type (WT) worms.**

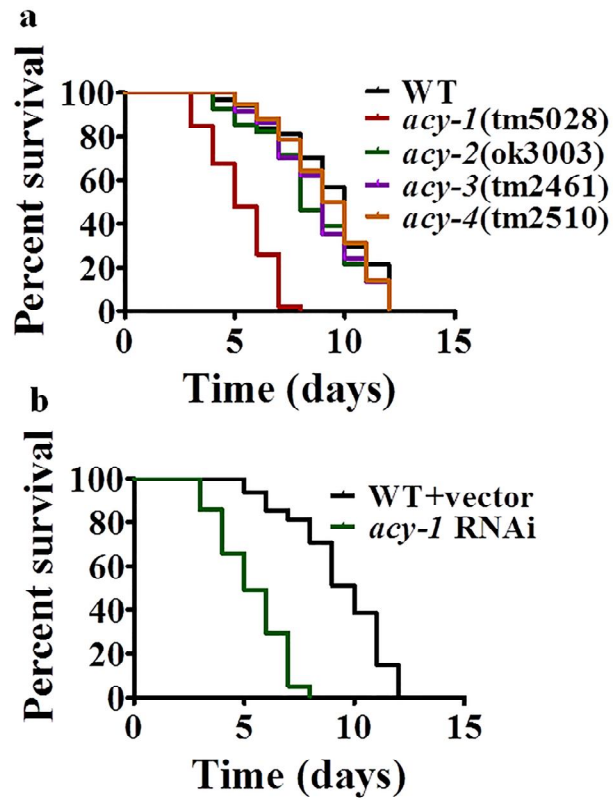

**Supplementary Figure 2. Mutation or knockdown of *acy-1* reduces survival of worms under cold conditions.** (a)  $P < 0.001$  relative to wild type (WT) animals. (b)  $P < 0.01$  relative to WT with empty vector.

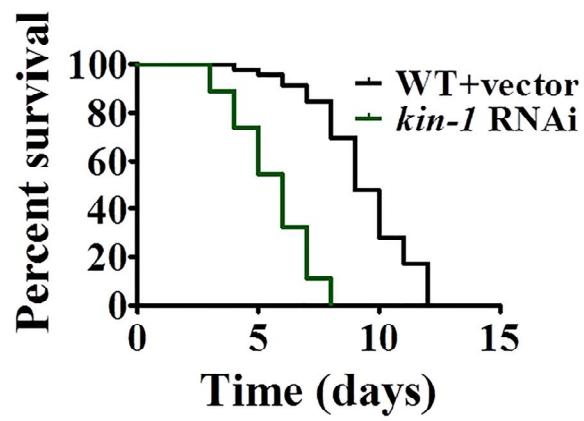

**Supplementary Figure 3. Knockdown of *kin-1* by RNAi reduces survival of worms under cold conditions.  $P < 0.01$  relative to wild type (WT) animals with empty vector.**

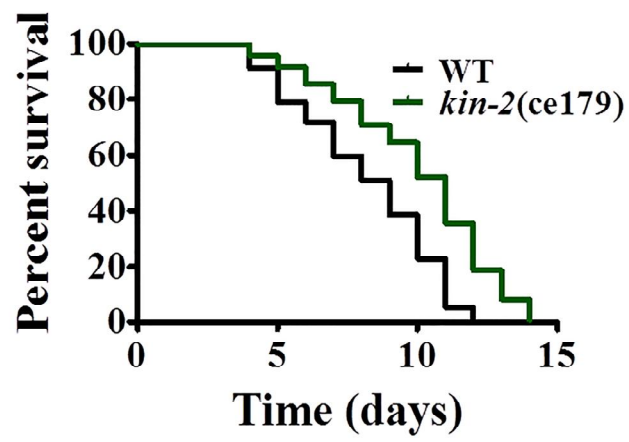

**Supplementary Figure 4. Mutation in *kin-2(ce179)* promotes survival of worms under cold conditions.  $P < 0.01$  relative to wild type (WT) worms.**

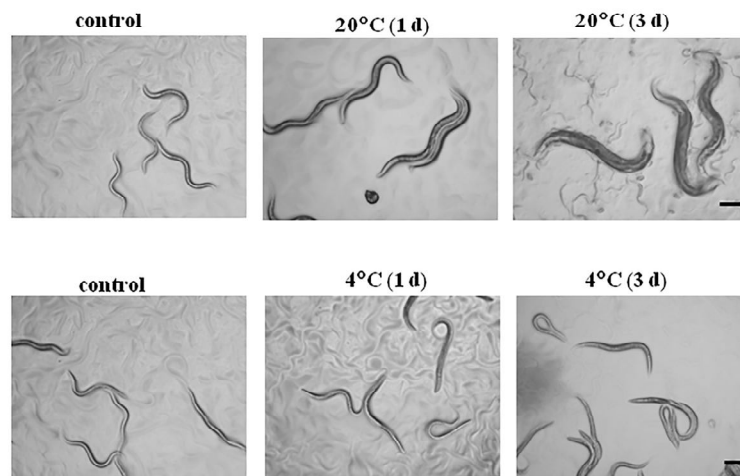

**Supplementary Figure 5. Exposure to chill (4 °C) resulted the defects in egg production.** Scale bar, 100  $\mu$ m.

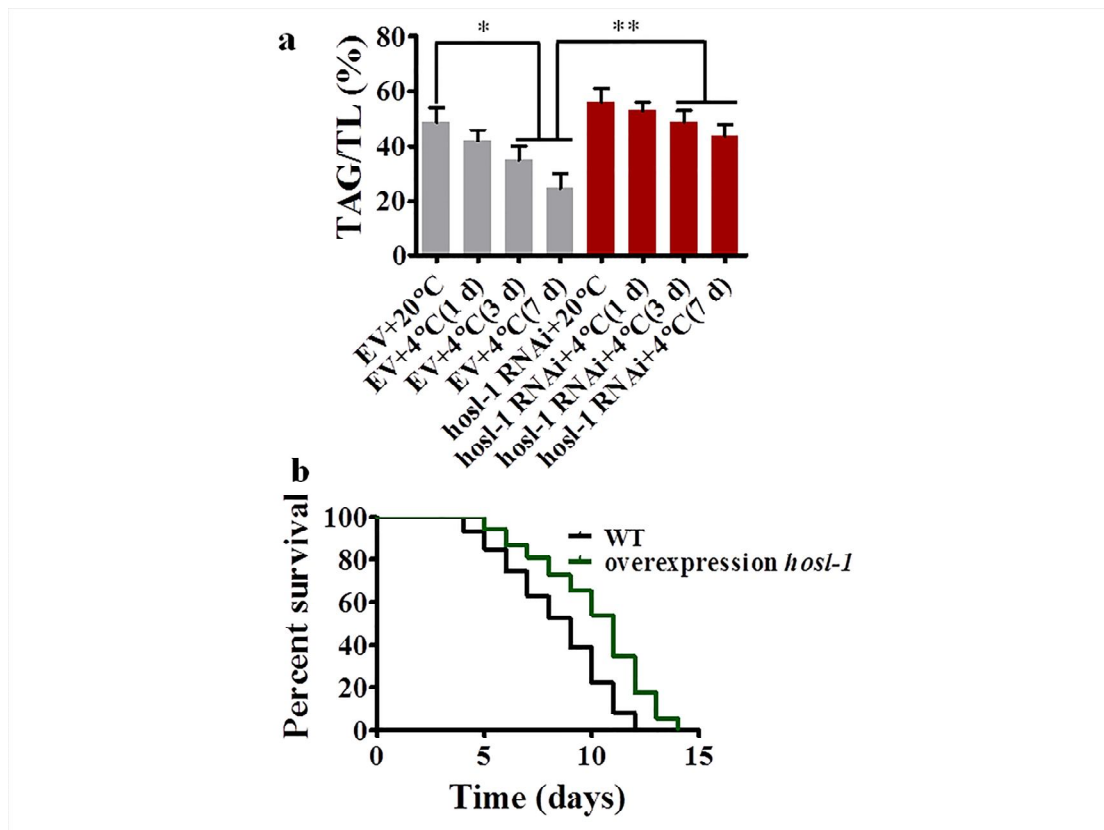

**Supplementary Figure 6. Knockdown of *hosl-1* by RNAi inhibits cold-induced lipid hydrolysis.** (a) The relative triacylglycerol contents were determined by GC-MS. \* $P < 0.05$ ; \*\* $P < 0.01$ . **Overexpression *hosl-1* in worms exhibited enhanced resistance to cold stress.** (b)  $P < 0.01$  relative to wild type (WT) worms.

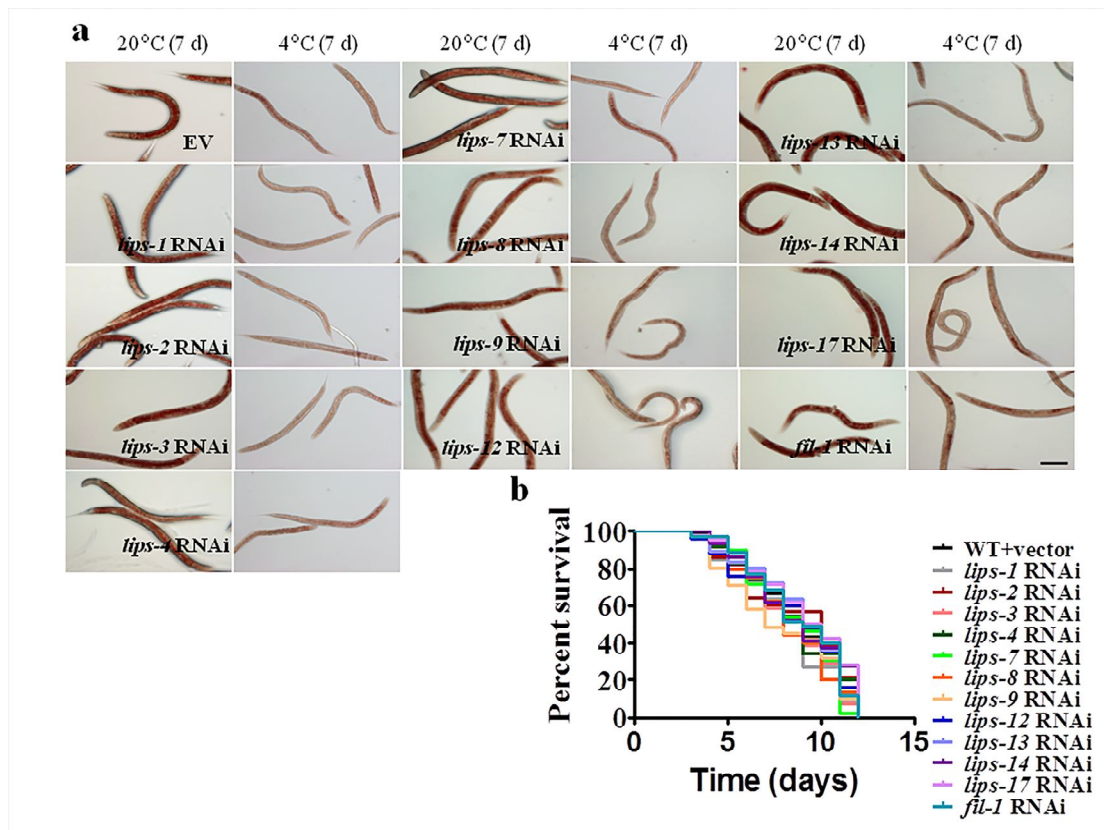

**Supplementary Figure 7. Twelve class II lipase genes are not involved in lipid hydrolysis and cold tolerance.** (a) Lipid content was determined by staining with Oil Red O. Scale bar, 150  $\mu$ m. (b) Knockdown of these genes by RNAi did not influence survival of worms at 4°C.



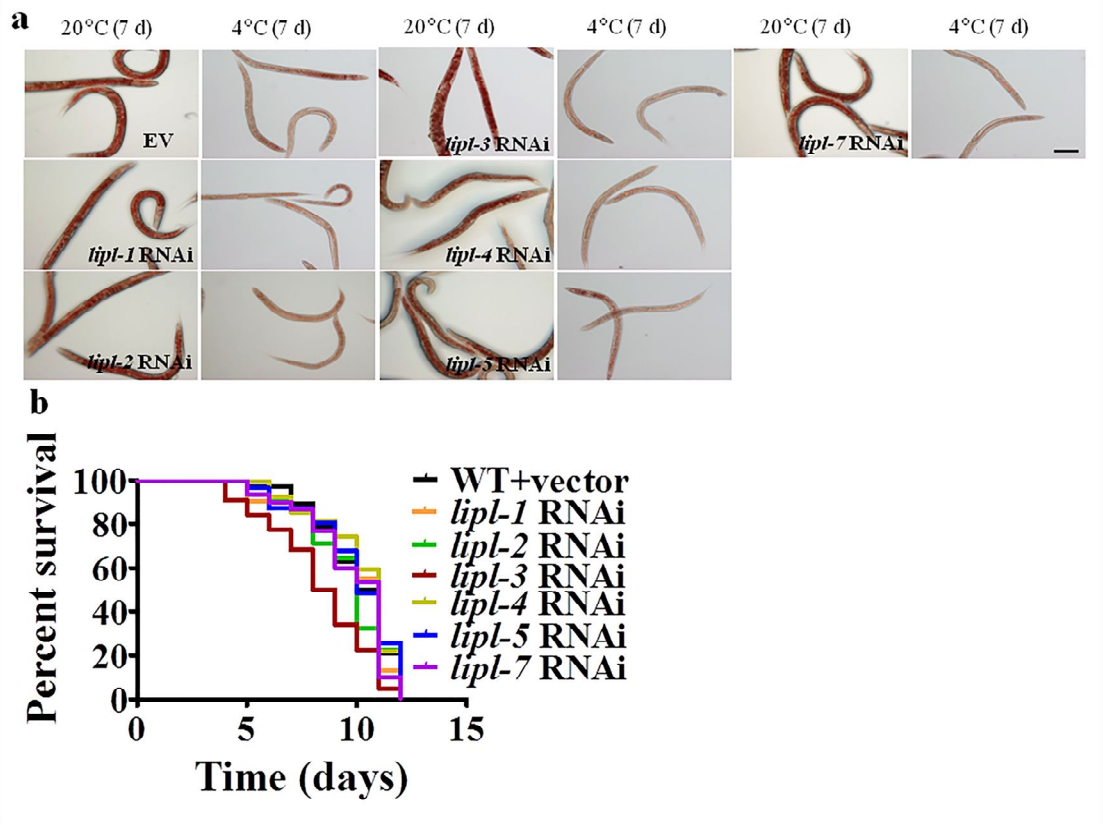

**Supplementary Figure 8. Six lipase-related genes are not involved in lipid hydrolysis and cold tolerance.** (a) Lipid content was determined by staining with Oil Red O. Scale bar, 150  $\mu$ m. (b) Knockdown of these genes by RNAi did not influence survival of worms at 4°C.

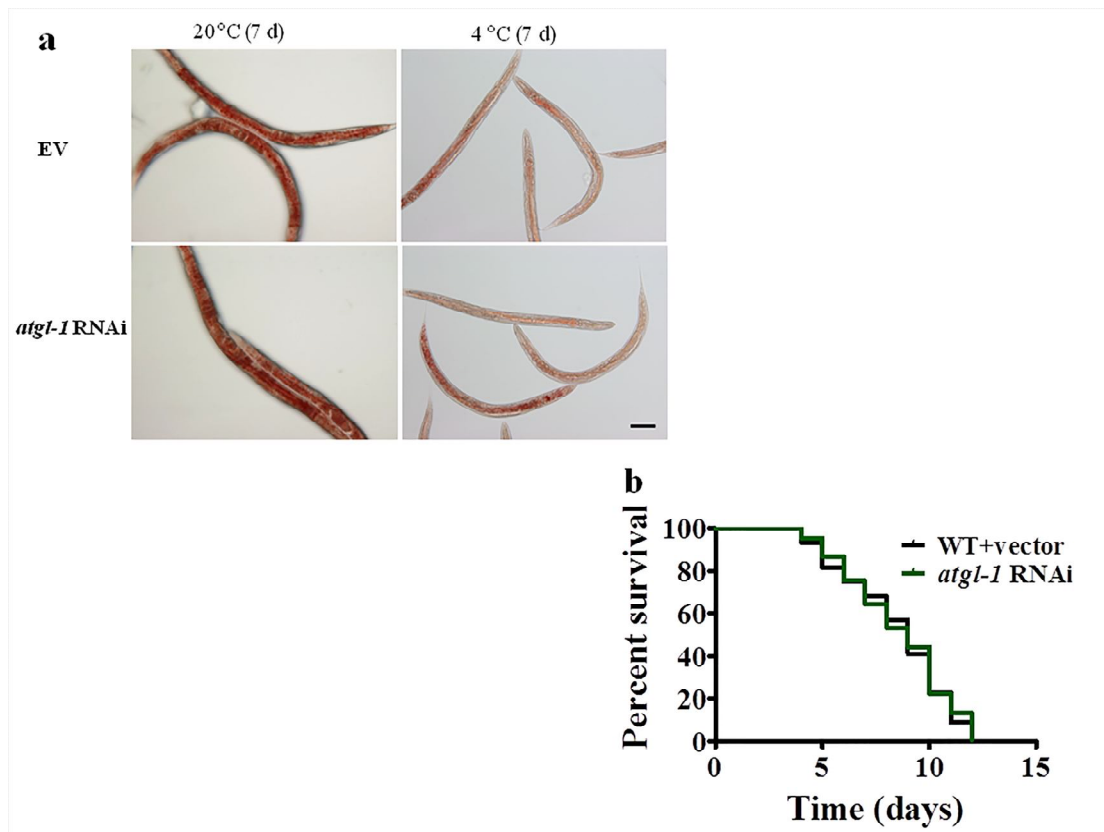

**Supplementary Figure 9. *atgl-1* is not involved in lipid hydrolysis and cold tolerance.** (a) Lipid content was determined by staining with Oil Red O. Scale bar, 100  $\mu\text{m}$ . (b) Knockdown of *atgl-1* by RNAi did not influence survival of worms at 4°C.

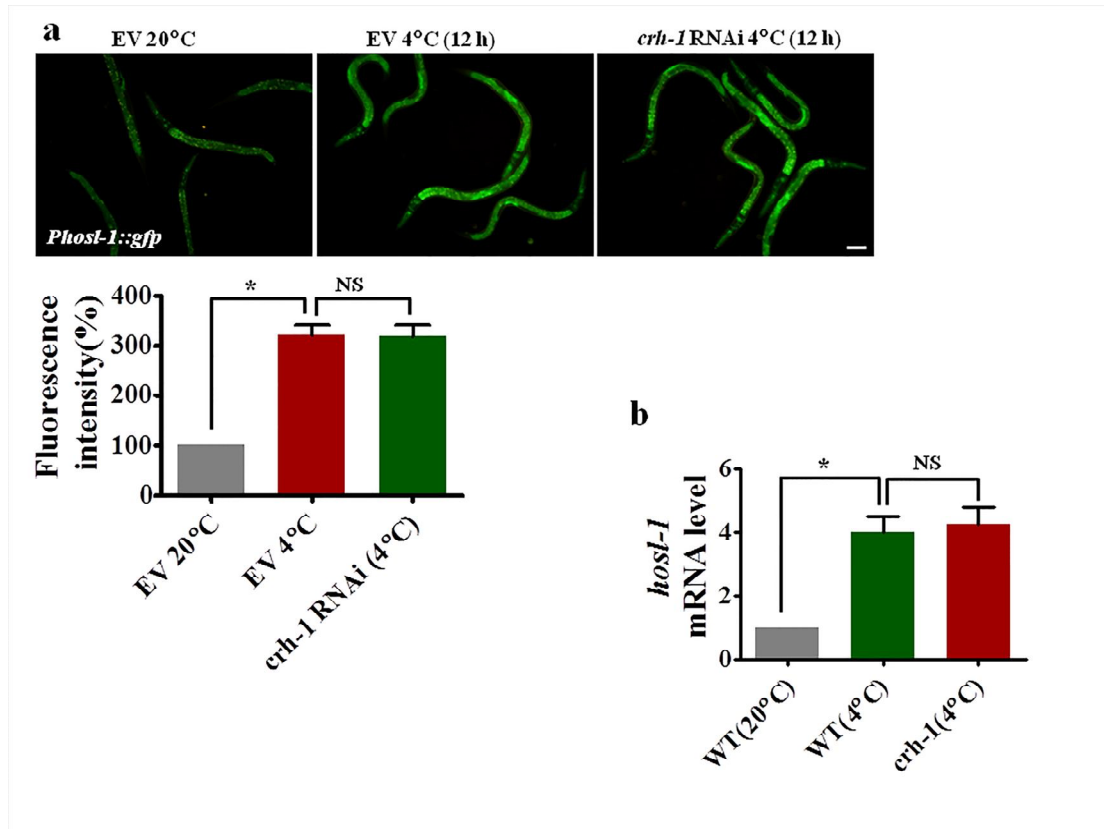

**Supplementary Figure 10. CRH-1 is not involved in up-regulation of *hosl-1* expression mediated by KIN-1.** (a) Knockdown of *crh-1* by RNAi did not influence the expression of *Phosl-1::gfp* at 4°C. Scale bar, 100  $\mu$ m. (b) The mutation in *crh-1*(*tz2*) did not influence the mRNA levels of *hosl-1* at 4°C. \* $P < 0.05$ ; NS, not significant.

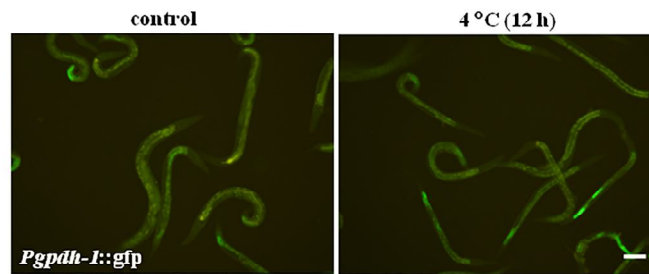

**Supplementary Figure 11. Cold stress does not influence the expression of *gpdh-1*.**

The expression of *Pgdh-1::gfp* was not altered in worms exposed to cold (4 °C).

Scale bar, 100  $\mu$ m.

**Supplementary Table 2. The efficiency of RNAi is detected by quantitative RT-PC.**

| Gene           | The efficiency of RNAi |
|----------------|------------------------|
| <i>gsa-1</i>   | 85%                    |
| <i>acy-1</i>   | 80%                    |
| <i>kin-1</i>   | 88%                    |
| <i>hosl-1</i>  | 81.5%                  |
| <i>atgl-1</i>  | 90%                    |
| <i>lipl-1</i>  | 75%                    |
| <i>lipl-2</i>  | 78%                    |
| <i>lipl-3</i>  | 90%                    |
| <i>lipl-4</i>  | 82%                    |
| <i>lipl-5</i>  | 78%                    |
| <i>lipl-7</i>  | 70%                    |
| <i>lips-1</i>  | 85%                    |
| <i>lips-2</i>  | 80%                    |
| <i>lips-3</i>  | 90%                    |
| <i>lips-4</i>  | 89%                    |
| <i>lips-7</i>  | 77%                    |
| <i>lips-8</i>  | 87%                    |
| <i>lips-9</i>  | 92%                    |
| <i>lips-12</i> | 72%                    |
| <i>lips-13</i> | 79%                    |
| <i>lips-14</i> | 84%                    |
| <i>lips-17</i> | 91%                    |
| <i>fil-1</i>   | 80%                    |
| <i>crh-1</i>   | 75%                    |

**Supplementary Table 3. Primer sequences used for quantitative RT-PC.**

| Gene                                 | Sequences (5'→3')                                | Product length (bp) |
|--------------------------------------|--------------------------------------------------|---------------------|
| <i>gsa-1-F</i><br><i>gsa-1-R</i>     | TGCTGGAAAGACAAGGGAGT<br>ATCGTAGTTGTTCTGTGCGCAC   | 117                 |
| <i>acy-1-F</i><br><i>acy-1-R</i>     | GCCGCTCAATACCAAAGGTT<br>GCAACTGGAGTCATAAACGC     | 119                 |
| <i>kin-1-F</i><br><i>kin-1-R</i>     | GAAGGACAACAAGAACTCGGC<br>GAATGATCCGGTTCCAAGG     | 145                 |
| <i>hosl-1-F</i><br><i>hosl-1-R</i>   | GGCTCGCTCATCAACACTGG<br>CACCATTTCTCCACTCTTCC     | 231                 |
| <i>atgl-1-F</i><br><i>atgl-1-R</i>   | CGGGTTGTGGATTCTTTGTG<br>TGAGACCACAGGCAACGAT      | 126                 |
| <i>lipl-1-F</i><br><i>lipl-1-R</i>   | TCCTGGAGCACGGTTATGTT<br>TTTGTGGCGTGGTCACTTC      | 94                  |
| <i>lipl-2-F</i><br><i>lipl-2-R</i>   | ACGGACAAGATACACCACCA<br>TCTCCAAGCCAATCATCGTCA    | 91                  |
| <i>lipl-3-F</i><br><i>lipl-3-R</i>   | CTGTGACAATGTGTGCTTCCT<br>TCCGTGCCGAACCATCTGAA    | 142                 |
| <i>lipl-4-F</i><br><i>lipl-4-R</i>   | GATGTGAATAATTCCCCTCC<br>GCCCAACCACACATCAAACC     | 135                 |
| <i>lipl-5-F</i><br><i>lipl-5-R</i>   | GAGTGCTGGTTTCTGTTCG<br>TCCCAACTCCAGTCCCAGAA      | 129                 |
| <i>lipl-7-F</i><br><i>lipl-7-R</i>   | CAAATAGCCGTGGAACCTCCTG<br>CCAAATCCACACTCGCTGTC   | 123                 |
| <i>lips-1-F</i><br><i>lips-1-R</i>   | TCGGACCCAACCTATCGCAT<br>AGTCATTTCTGGGCAGGTGC     | 146                 |
| <i>lips-2-F</i><br><i>lips-2-R</i>   | TCCCAGGCAGCAACATTTG<br>TTGGTCCGCTGCTGTTTCA       | 77                  |
| <i>lips-3-F</i><br><i>lips-3-R</i>   | AAACTGTTCCCCTTGGTGC<br>AGCGACCGTTCATTCCTGGA      | 258                 |
| <i>lips-4-F</i><br><i>lips-4-R</i>   | GTGGCAAAGTTGATGTGTTTCG<br>ATAGCCTCCACACGAATCTCC  | 137                 |
| <i>lips-7-F</i><br><i>lips-7-R</i>   | CCTTCCTGTCAGTTGCTGGT<br>CCATCACGCTTCACAAATCCA    | 253                 |
| <i>lips-8-F</i><br><i>lips-8-R</i>   | TTTGTTGGTGTGCTGGGC<br>CAATCCGATAACCCTGCTGC       | 120                 |
| <i>lips-9-F</i><br><i>lips-9-R</i>   | TCGGTTTCTCGCTTGGTGT<br>TGTCAGCGGTTCTCCAAGGT      | 92                  |
| <i>lips-12-F</i><br><i>lips-12-R</i> | GAAACCGTCTACGCAACATCA<br>CCCTTCTCCATACGCCACAAT   | 156                 |
| <i>lips-13-F</i><br><i>lips-13-R</i> | GGGCAATACAACCGACACTTC<br>GTGCCACAATATCAACCTGA    | 122                 |
| <i>lips-14-F</i><br><i>lips-14-R</i> | CATACAGCACAACCTCACACCT<br>TGAACCTTCGTCCGGTAGGCAA | 109                 |

|                                      |                                               |     |
|--------------------------------------|-----------------------------------------------|-----|
| <i>lips-17-F</i><br><i>lips-17-R</i> | TGTATCTGTTGCTGGAGCC<br>CTTTATCGTCTCCTGGTCCGT  | 176 |
| <i>fil-1-F</i><br><i>fil-1-R</i>     | GGAGTTACCCTTGCCAGAAAG<br>AGACCCAAATCACAGGAACC | 74  |
| <i>crh-1-F</i><br><i>crh-1-R</i>     | CGCCGTTGATGATGCTCTTG<br>TCACCTTATCCGCCGTTTCT  | 141 |
